# Supplementary material for: Inhibition of LINE-1 Retrotransposition by Capsaicin
Source: PubMed Central journal article supplement (PMC6214084; doi:10.3390/ijms19103243), 2018-10-19
Supplement: ijms-19-03243-s001.pdf [file ijms-19-03243-s001.pdf]

**Supplemental Table S1. Compounds derived from natural medicines screened in this study**

---

|                                 |                              |                    |
|---------------------------------|------------------------------|--------------------|
| Aconitine                       | Dehydrocorydaline Nitrate    | (Z)-Ligustilide    |
| Albiflorin                      | Dehydrocostuslactone         | Limonin            |
| Alisol A                        | demethoxycurcumine           | Liquiritin         |
| Alisol B                        | Dihydrocapsaicin             | Loganin            |
| Alkannin                        | Dimethylesculetin            | Luteolin           |
| Amygdalin                       | Eleutheroside B              | Magnolol           |
| Arbutin                         | (-)-Epigallocatechin Gallate | Mesaconitine       |
| Astragaloside IV                | Epihesperidin                | Naringin           |
| Atractylenolide III             | Ergosterol                   | Nodakenin          |
| Atractylodin                    | beta-Eudesmol                | Osthole            |
| Atropine Sulfate                | Evodiamine                   | Oxymatrine         |
| Aucubin                         | (E)-Ferulic Acid             | Paeoniflorin       |
| Baicalein                       | Geniposide                   | Paeonol            |
| Baicalin                        | Geniposidic Acid             | Palmatine Chloride |
| Barbaloin                       | Gentiopicroside              | Perillaldehyde     |
| Benzoylmesaconine Hydrochloride | [6]-Gingerol                 | Praeruptorin A     |
| Berberine Chloride              | Ginsenoside-Rb1              | Puerarin           |
| Bergenin                        | Ginsenoside-Rc               | Rhynchophylline    |
| Bisdemethoxycurcumin            | Ginsenoside-Rd               | Rosmarinic Acid    |
| Bufalin                         | Ginsenoside-Re               | Saikosaponin a     |
| Bufotalin                       | Ginsenoside-Rg1              | Saikosaponin b2    |
| Capillarisin                    | Glabridin                    | Saikosaponin c     |
| (E)-Capsaicin                   | Glycyrrhizic Acid            | Saikosaponin d     |
| Catalpol                        | Gomisin A                    | Schizandrin        |
| (E)-Chlorogenic Acid            | Gomisin N                    | Sennoside A        |
| (E)-Cinnamic Acid               | Hesperidin                   | Sennoside B        |
| Cinobufagin                     | Hirsutine                    | Shikonin           |
| Cinobufotalin                   | Honokiol                     | [6]-Shogaol        |
| Coptisine Chloride              | Hypaconitine                 | Sinomenine         |
| Corydaline                      | Icariin                      | Swertiamarin       |
| Costunolide                     | Isofraxidine                 | Timosaponin A-III  |
| Curcumin                        | Isorhynchophylline           | Wogonin            |

---
